# Supplementary material for: Tailoring of {116} faceted single crystalline anatase nanosheet arrays and their improved electrochemical performance
Source: Royal Society of Chemistry journal article supplement (doi:10.1039/c5ce00408j), 2015-01-01
Supplement: c5ce00408j1.pdf [file c5ce00408j1.pdf]

## Supporting Information for

# Tailoring of {116} faceted single crystalline anatase nanosheets array and improved electrochemical performance

Feng Li,<sup>a</sup> Xiaoning Li,<sup>a</sup> Shangfeng Yang,<sup>abc</sup> Zhengping Fu,<sup>\*abc</sup>  
and Yalin Lu<sup>\*abc</sup>

<sup>a</sup>CAS Key laboratory of Materials for Energy Conversion, Department of Materials  
Science and Engineering, University of Science and Technology of China, Hefei  
230026, P. R. China

<sup>b</sup>National Laboratory for Physical Sciences at the Microscale, University of Science  
and Technology of China, Hefei 230026, P. R. China

<sup>c</sup>Synergetic Innovation Center of Quantum Information & Quantum Physics, University of  
Science and Technology of China, Hefei 230026, P. R. China

\*E-mail: [fuzp@ustc.edu.cn](mailto:fuzp@ustc.edu.cn); [yllu@ustc.edu.cn](mailto:yllu@ustc.edu.cn)

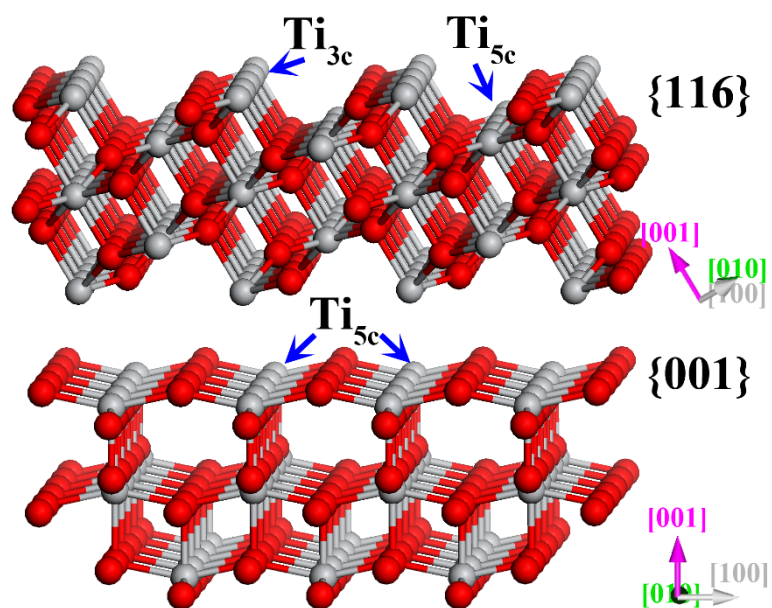

Figure S1. Atomic structures of {116} and {001} facets.

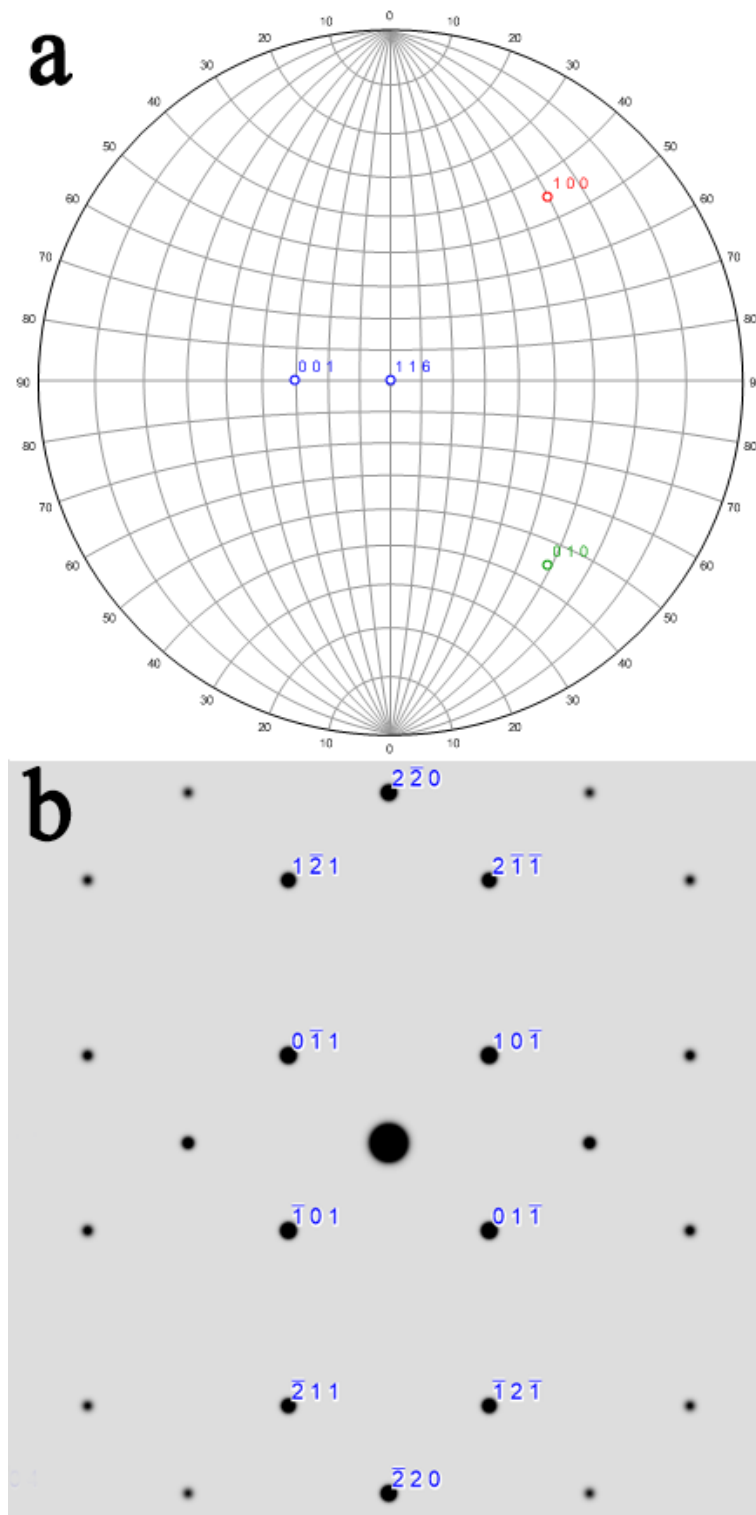

Figure S2. (a) (116) stereographic projection, (b) corresponding single crystalline diffraction pattern.

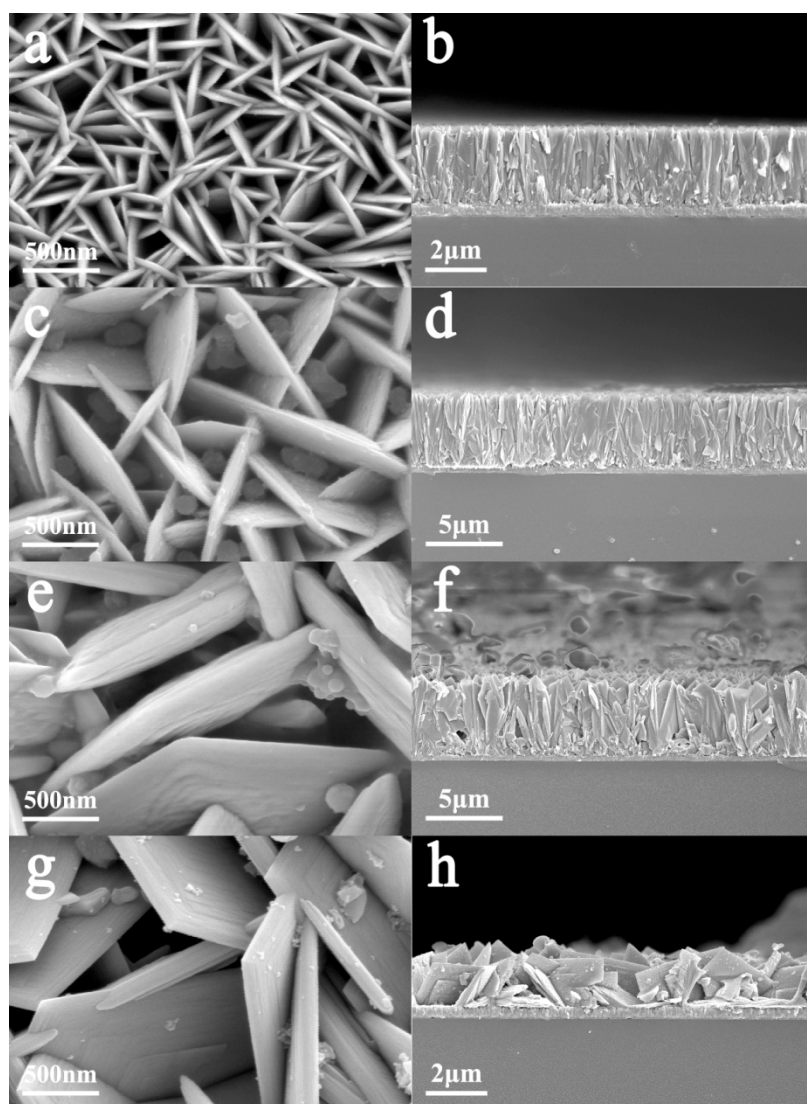

Figure S3. FESEM images of 'nanofishnet' grown on FTO substrate in 15 ml ethanol, (a,b) 0.5 ml titanium butoxide, 0.5 ml hydrofluoric acid, (c,d) 1.0 ml titanium butoxide, 1.0 ml hydrofluoric acid, (e,f) 1.5 ml titanium butoxide, 1.5 ml hydrofluoric acid, (g,h) 2.0 ml titanium butoxide, and 2.0 ml hydrofluoric acid at 200 °C for 12 h.

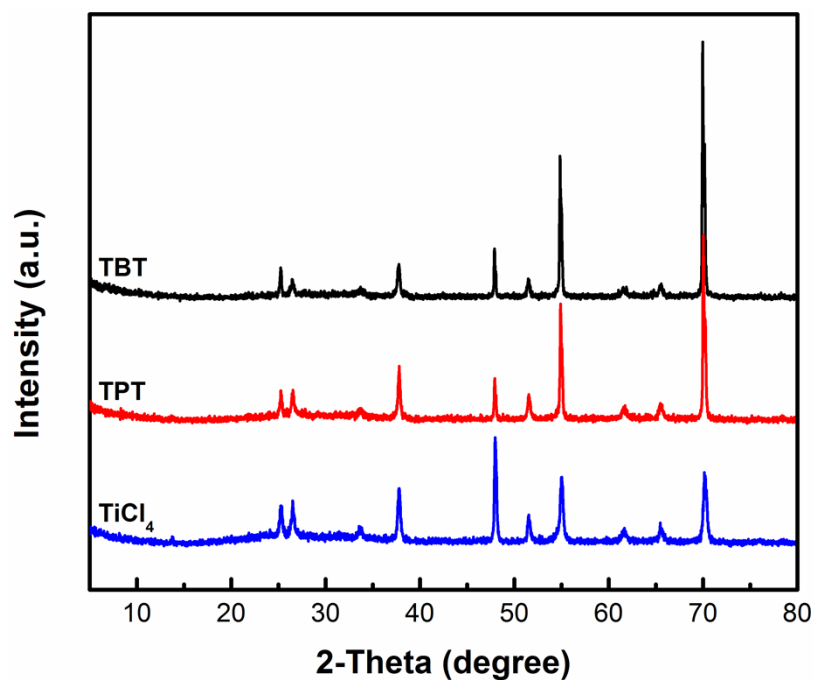

Figure S4. XRD patterns of ‘nanofishnet’ grown on FTO substrate at 200 °C for 12 h in 15 ml ethanol and 1.0 ml hydrofluoric acid with 1.0 ml different titanium precursors (titanium butoxide (TBT), titanium isopropylat (TPT), titanium tetrachloride ( $\text{TiCl}_4$ )).

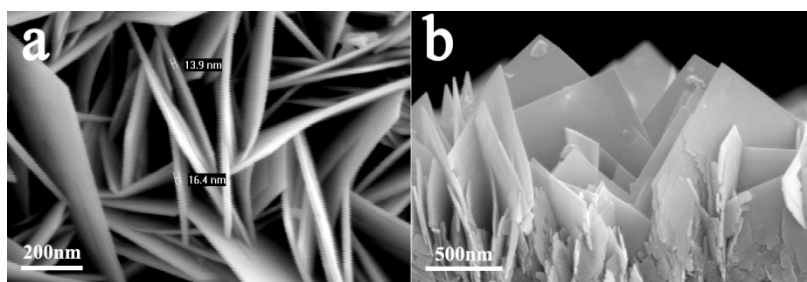

Figure S5. Magnified FESEM images of ‘nanofishnet’ grown on FTO substrate at 200 °C for 12 h in 15 ml ethanol and 1.0 ml hydrofluoric acid with 1.0 ml titanium tetrachloride ( $\text{TiCl}_4$ )).

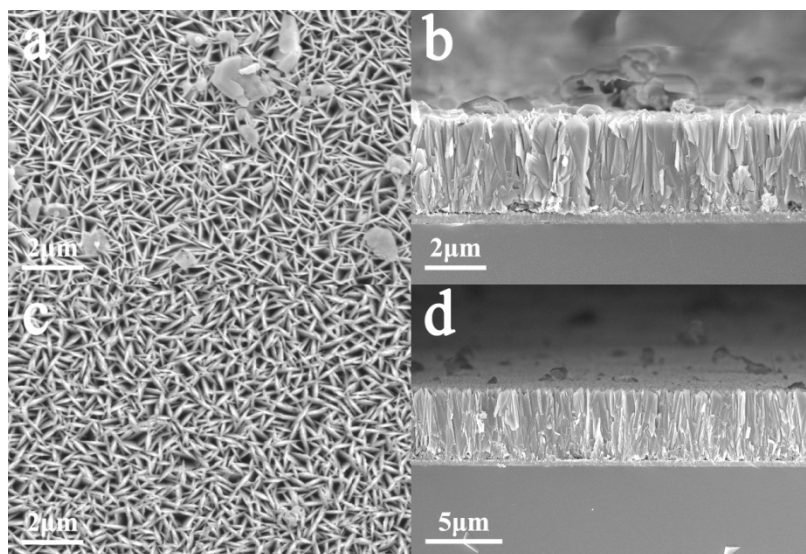

Figure S6. FESEM images of ‘nanofishnet’ grown on FTO substrate in 15 ml ethanol, 1.0 ml titanium butoxide, and 1.0 ml hydrofluoric acid with (a,b) 0.5 ml OA, (c,d) 0.5 g NaF at 200 °C for 12 h.

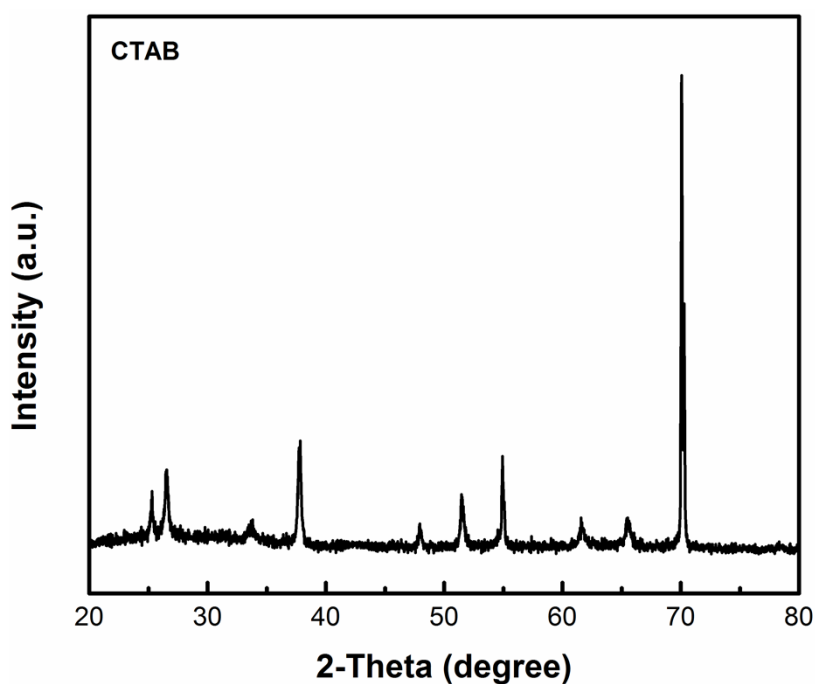

Figure S7. XRD patterns of ‘nanofishnet’ grown on FTO substrate in 15 ml ethanol, 1.0 ml titanium butoxide, and 1.0 ml hydrofluoric acid with 0.5 g CTAB at 200 °C for 12h.
